# Supplementary material for: Effect of Very-Low-Calorie Ketogenic Diet on Psoriasis Patients: A Nuclear Magnetic Resonance-Based Metabolomic Study
Source: PubMed Central journal article supplement (PMC8016365; doi:10.1021/acs.jproteome.0c00646), 2020-11-09
Supplement: pr0c00646_si_001.pdf [file pr0c00646_si_001.pdf]

# Effect of very-low-calorie ketogenic diet on psoriasis patients: an NMR based metabolomic study

Giuseppe Castaldo<sup>1</sup>, Imma Pagano<sup>1,2</sup>, Manuela Grimaldi<sup>2</sup>, Carmen Marino<sup>2</sup>, Paola Molettieri<sup>1</sup>, Angelo Santoro<sup>2</sup>, Ilaria Stillitano<sup>2</sup>, Rocco Romano<sup>2</sup>, Paola Montoro<sup>2</sup>, Anna Maria D'Ursi<sup>2\*</sup>, Luca Rastrelli<sup>1,2\*</sup>

<sup>1</sup>NutriKeto\_LAB Unisa - "San Giuseppe Moscati" National Hospital (AORN), Contrada Amoretta, 83100 Avellino (AV), Italy.

<sup>2</sup>Department of Pharmacy, University of Salerno, Via Giovanni Paolo II 132, 84084 Fisciano (SA), Italy.

\*Corresponding Authors: Prof. Anna Maria D'Ursi, Ph.D. Associate Professor, DIFARMA, University of Salerno via Giovanni Paolo II, 132, 84084, Fisciano (SA) Tel +39089969748, e-mail: dursi@unisa.it; Luca Rastrelli, Department of Pharmacy, University of Salerno, Via Giovanni Paolo II 132, 84084 Fisciano (SA), Italy, Tel.: +39 089969766, e-mail address: dursi@unisa.it; rastrelli@unisa.it

## Table of contents

- **Figure S1:** The green line on top shows the accumulated variance explained; the blue underneath line shows the variance explained by individual PC.

- **Figure S2:** Pairwise score plots among the selected PCs. The explained variance of each PC is shown in the corresponding diagonal cell. On the x-axis and y-axis are represented the position points in the Cartesian space of the individual samples.

- **Figure S3:** PLS-DA classification using different number of components. The red star indicates the best classifier.

- **Table S1:** Important features identified by Fold Change and logarithmic Fold Change ( $\log_2(FC)$ ) parameters calculated.

- **Table S2:** Important features identified by *t-tests* values, *p-values* (Threshold <0.05), logarithmic *p-values* and False Discovery Rate (*FDR*) parameters calculated for the most statistically significant compounds.

- **Table S3:** Important features identified by PLS-DA and relative component VIP score.

- **Table S4:** Results from quantitative Enrichment Analysis.

- **Table S5:** Pathway analysis by Reactome and relative p-value and number of hits.

- **Table S6:** Clinical features of the patients during the follow-up.

**Figure S1:** The green line on top shows the accumulated variance explained; the blue underneath line shows the variance explained by individual PC.

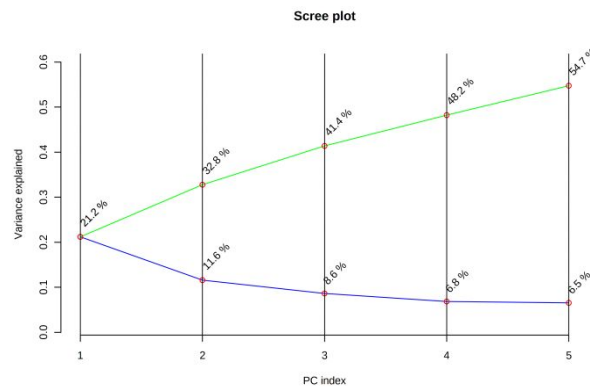

**Figure S2:** Pairwise score plots among the selected PCs. The explained variance of each PC is shown in the corresponding diagonal cell. On the x-axis and y-axis are represented the position points in the Cartesian space of the individual samples.

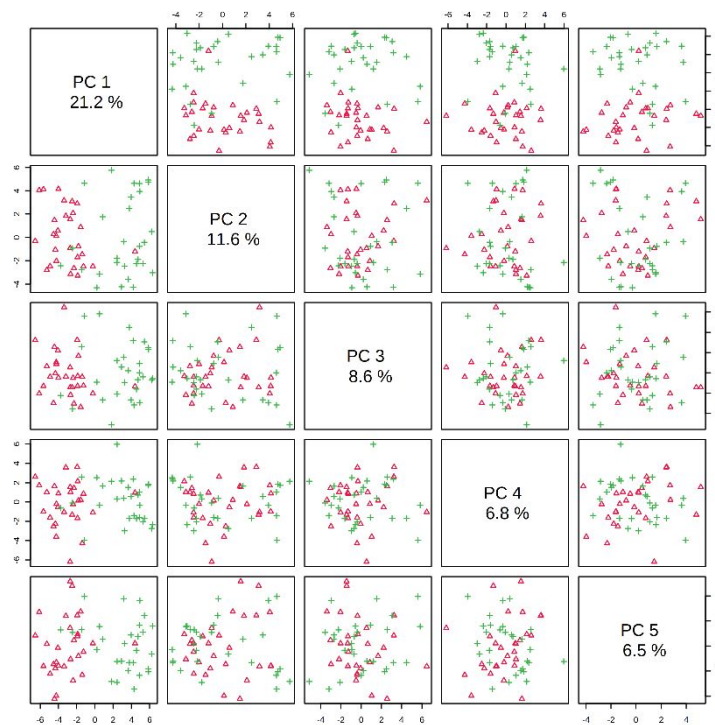

**Figure S3:** PLS-DA classification using different number of components. The red star indicates the best classifier.

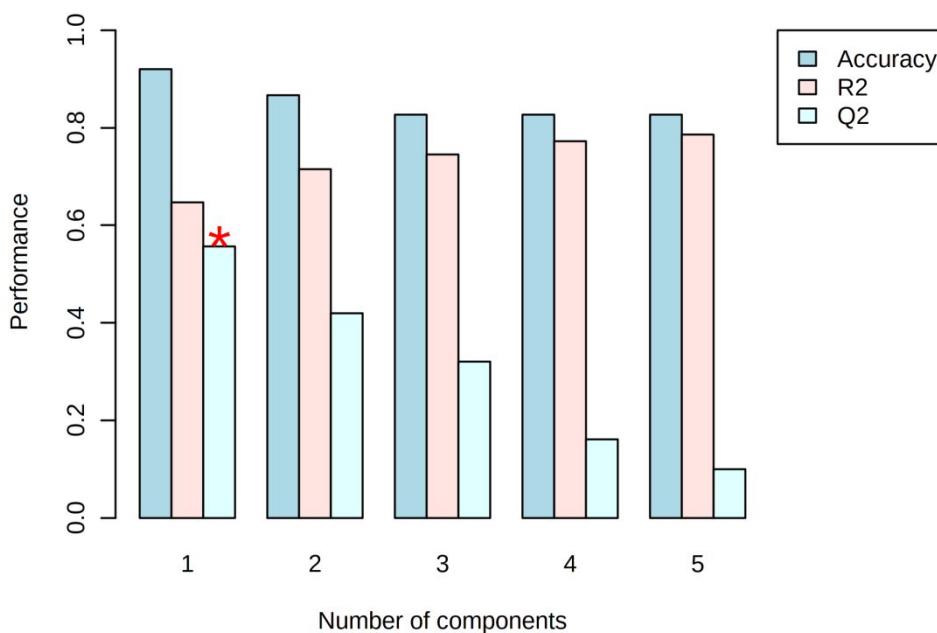

**Table S1:** Important features identified by Fold Change and logarithmic Fold Change ( $\log_2(FC)$ ) parameters calculated.

| Compounds   | Fold Change | $\log_2(FC)$ |
|-------------|-------------|--------------|
| L-Lysine    | 6.63        | 2.73         |
| L-Histidine | 5.55        | 2.47         |
| Succinate   | 0.20        | -2.29        |
| Methionine  | 4.67        | 2.22         |
| Formate     | 4.40        | 2.14         |
| L-Serine    | 3.76        | 1.91         |
| Malonate    | 3.69        | 1.88         |
| Tryptophan  | 3.47        | 1.79         |
| L-Ornithine | 3.04        | 1.60         |
| Tyrosine    | 2.60        | 1.37         |
| L-Arginine  | 2.23        | 1.15         |
| Isoleucine  | 0.45        | -1.13        |
| Choline     | 2.10        | 1.07         |
| L-Glutamine | 2.07        | 1.05         |

**Table S2:** Important features identified by *t*-test values, *P*-values (Threshold <0.05), logarithmic *P*-values and False Discovery Rate (*FDR*) parameters calculated for the most statistically significant compounds.

| Compounds         | t.stat | P-value    | -log10(p) | FDR        |
|-------------------|--------|------------|-----------|------------|
| Formate           | 12.6   | 4.4517e-18 | 17.351    | 1.7362e-16 |
| Tryptophan        | 8.49   | 1.1764e-11 | 10.929    | 2.0211e-10 |
| Tyrosine          | 8.42   | 1.5547e-11 | 10.808    | 2.0211e-10 |
| L-Lysine          | 8.06   | 6.0830e-12 | 10.216    | 5.9309e-10 |
| L-Histidine       | 7.72   | 2.1574e-10 | 9.6661    | 1.6828e-09 |
| Methionine        | 7.61   | 3.3584e-10 | 9.4739    | 2.1829e-09 |
| L-Arginine        | 6.40   | 3.3424e-08 | 7.4759    | 1.8622e-07 |
| L-Lactic acid     | -6.02  | 1.3854e-07 | 6.8584    | 6.7539e-07 |
| L-Serine          | 5.78   | 3.4188e-07 | 6.4661    | 1.4815e-06 |
| Choline           | 5.25   | 2.3648e-06 | 5.6262    | 9.2228e-06 |
| Isoleucine        | -5.00  | 5.7803e-06 | 5.2380    | 2.0494e-05 |
| L-Ornithine       | 4.96   | 6.8468e-06 | 5.1645    | 2.2252e-05 |
| Succinate         | -4.30  | 6.7160e-06 | 4.1729    | 2.0148e-04 |
| L-Glutamine       | 4.23   | 8.8084e-05 | 4.0551    | 2.4538e-04 |
| Malonate          | 4.10   | 1.3621e-04 | 3.8658    | 3.5415e-04 |
| L-Leucine         | 3.79   | 3.5944e-04 | 3.4444    | 8.7614e-04 |
| Dimethyl sulfone  | 3.73   | 4.4553e-04 | 3.3511    | 1.0221e-02 |
| Aspartate         | -3.30  | 1.6732e-03 | 2.7765    | 3.6253e-02 |
| L-Proline         | 3.24   | 1.9958e-03 | 2.6999    | 4.0966e-02 |
| L-Glutamic acid   | -2.79  | 7.1938e-02 | 2.1430    | 1.4028e-02 |
| 1-Methylhistidine | -2.45  | 1.7614e-02 | 1.7541    | 3.2712e-02 |

**Table S3:** Important features identified by PLS-DA and relative component VIP score.

| Metabolite            | Comp. 1 | Comp. 2 | Comp. 3 | Comp. 4 | Comp. 5 |
|-----------------------|---------|---------|---------|---------|---------|
| 1-Methylhistidine     | 0.1313  | 0.1485  | 0.1522  | 0.2115  | 0.2153  |
| 2-Hydroxybutyric acid | 0.3934  | 0.3770  | 0.4481  | 0.5699  | 0.5676  |
| Acetic acid           | 0.1443  | 0.1593  | 0.1561  | 0.1553  | 0.1621  |
| Betaine               | 0.2506  | 0.2429  | 0.2408  | 0.2370  | 0.2343  |
| Acetoacetate          | 0.9722  | 1.0820  | 1.0609  | 1.0549  | 1.0476  |
| Creatine              | 0.1839  | 0.2063  | 0.3000  | 0.2098  | 0.2491  |
| Choline               | 1.7734  | 1.6961  | 1.6703  | 1.6466  | 1.6286  |
| Glycine               | 0.3172  | 0.3294  | 0.4045  | 0.6112  | 0.6869  |
| Formate               | 0.4538  | 0.4793  | 0.4711  | 0.4634  | 0.4580  |

|                       |        |        |        |        |        |
|-----------------------|--------|--------|--------|--------|--------|
| L-Glutamic acid       | 0.8750 | 0.8365 | 0.8346 | 0.8262 | 0.8232 |
| Tyrosine              | 0.3790 | 0.3941 | 0.4194 | 0.4210 | 0.4333 |
| L-Phenylalanine       | 0.0882 | 0.0932 | 0.1335 | 0.1447 | 0.1592 |
| L-Alanine             | 1.0361 | 1.0080 | 1.0042 | 0.9850 | 0.9844 |
| L-Proline             | 0.5301 | 0.5073 | 0.5056 | 0.5059 | 0.5002 |
| L-Threonine           | 0.2809 | 0.3276 | 0.3575 | 0.3529 | 0.3634 |
| L-Asparagine          | 0.1972 | 0.2170 | 0.2582 | 0.2840 | 0.2933 |
| Isoleucine            | 0.2348 | 0.2319 | 0.2310 | 0.2305 | 0.2988 |
| L-Histidine           | 0.0657 | 0.5181 | 0.5868 | 0.6450 | 0.7339 |
| L-Lysine              | 0.2026 | 0.2900 | 0.3330 | 0.3266 | 0.3252 |
| L-Lactic acid         | 0.3376 | 0.4495 | 0.4843 | 0.4750 | 0.4816 |
| Aspartate             | 0.0203 | 0.1164 | 0.1572 | 0.2593 | 0.2769 |
| L-Ornithine           | 0.1171 | 0.1120 | 0.1342 | 0.1416 | 0.1480 |
| Pyruvic acid          | 1.8077 | 1.7964 | 1.7649 | 1.7349 | 1.7181 |
| Succinate             | 0.3608 | 0.3466 | 0.4474 | 0.4901 | 0.4845 |
| 3-Hydroxybutyric acid | 4.3921 | 4.2296 | 4.1454 | 4.0732 | 4.0267 |
| Creatinine            | 0.0136 | 0.1364 | 0.3756 | 0.3714 | 0.3951 |
| L-Glutamine           | 0.3221 | 0.8027 | 0.7874 | 0.7826 | 0.8301 |
| L-Leucine             | 2.4456 | 2.3559 | 2.3098 | 2.2717 | 2.2529 |
| Methionine            | 0.3597 | 0.5952 | 0.5885 | 0.6053 | 0.5996 |
| Isopropyl alcohol     | 0.5379 | 0.5264 | 0.5705 | 0.6015 | 0.6661 |
| Valine                | 0.0247 | 0.0796 | 0.0820 | 0.2890 | 0.3140 |
| Tryptophan            | 0.0403 | 0.5393 | 0.6037 | 0.6224 | 0.6263 |
| Acetone               | 0.9952 | 0.9658 | 0.9476 | 0.9471 | 0.9400 |
| Isobutyric acid       | 0.2358 | 0.2299 | 0.2622 | 0.2580 | 0.323  |
| Methanol              | 0.0303 | 0.2234 | 0.5370 | 0.7658 | 0.8219 |
| Propylene glycol      | 0.3722 | 0.6860 | 0.7365 | 0.7976 | 0.7912 |
| Dimethyl sulfone      | 0.5128 | 0.6758 | 0.8479 | 0.8355 | 0.8293 |
| D-Glucose             | 0.2285 | 0.2344 | 0.2420 | 0.2376 | 0.2667 |

**Table S4:** Results from quantitative Enrichment Analysis.

|                                          | <b>Total<br/>Cmpd</b> | <b>Hits</b> | <b>Statistic Q</b> | <b>Expected Q</b> | <b>Raw p</b> | <b>Holm p</b> | <b>FDR</b> |
|------------------------------------------|-----------------------|-------------|--------------------|-------------------|--------------|---------------|------------|
| Fatty Acid Biosynthesis                  | 35                    | 3           | 47.89              | 1.75              | 2.40E-13     | 1.51E-11      | 1.51E-11   |
| Glucose-Alanine Cycle                    | 13                    | 4           | 20.32              | 1.75              | 3.40E-07     | 2.11E-05      | 1.06E-05   |
| Phospholipid Biosynthesis                | 29                    | 1           | 35.40              | 1.75              | 8.41E-07     | 5.13E-05      | 1.06E-05   |
| Phosphatidylcholine Biosynthesis         | 14                    | 1           | 35.40              | 1.75              | 8.41E-07     | 5.13E-05      | 1.06E-05   |
| Phosphatidylethanolamine<br>Biosynthesis | 12                    | 1           | 35.40              | 1.75              | 8.41E-07     | 5.13E-05      | 1.06E-05   |
| Valine, Leucine and Isoleucine           | 60                    | 6           | 15.95              | 1.75              | 2.55E-06     | 1.48E-04      | 2.67E-05   |

|                                             |    |   |       |      |          |          |          |
|---------------------------------------------|----|---|-------|------|----------|----------|----------|
| Degradation                                 |    |   |       |      |          |          |          |
| Cysteine Metabolism                         | 26 | 2 | 22.22 | 1.75 | 3.08E-06 | 1.76E-04 | 2.78E-05 |
| Urea Cycle                                  | 29 | 6 | 12.06 | 1.75 | 5.19E-06 | 2.91E-04 | 4.09E-05 |
| Betaine Metabolism                          | 21 | 3 | 17.12 | 1.75 | 1.00E-05 | 5.53E-04 | 7.03E-05 |
| Pyruvate Metabolism                         | 48 | 4 | 16.65 | 1.75 | 1.18E-05 | 6.36E-04 | 7.42E-05 |
| Gluconeogenesis                             | 35 | 3 | 21.90 | 1.75 | 1.40E-05 | 7.42E-04 | 7.50E-05 |
| Pyruvaldehyde Degradation                   | 10 | 1 | 28.38 | 1.75 | 1.67E-05 | 8.69E-04 | 7.50E-05 |
| Glycolysis                                  | 25 | 2 | 25.50 | 1.75 | 1.73E-05 | 8.81E-04 | 7.50E-05 |
| Transfer of Acetyl Groups into Mitochondria | 22 | 2 | 25.50 | 1.75 | 1.73E-05 | 8.81E-04 | 7.50E-05 |
| Citric Acid Cycle                           | 32 | 2 | 18.55 | 1.75 | 1.78E-05 | 8.81E-04 | 7.50E-05 |
| Warburg Effect                              | 58 | 6 | 11.46 | 1.75 | 2.43E-05 | 1.17E-03 | 9.56E-05 |
| Amino Sugar Metabolism                      | 33 | 4 | 13.25 | 1.75 | 2.88E-05 | 1.36E-03 | 1.07E-04 |
| Alanine Metabolism                          | 17 | 4 | 12.97 | 1.75 | 3.60E-05 | 1.66E-03 | 1.26E-04 |
| Glycine and Serine Metabolism               | 59 | 9 | 8.73  | 1.75 | 4.70E-05 | 2.11E-03 | 1.56E-04 |
| Tryptophan Metabolism                       | 60 | 4 | 12.82 | 1.75 | 6.25E-05 | 2.75E-03 | 1.97E-04 |
| Glutamate Metabolism                        | 49 | 7 | 9.25  | 1.75 | 7.70E-05 | 3.31E-03 | 2.31E-04 |
| Phenylalanine and Tyrosine Metabolism       | 28 | 4 | 11.05 | 1.75 | 4.54E-04 | 1.91E-02 | 1.30E-03 |
| Tyrosine Metabolism                         | 72 | 4 | 9.98  | 1.75 | 5.77E-04 | 2.36E-02 | 1.58E-03 |
| Selenoamino Acid Metabolism                 | 28 | 1 | 18.72 | 1.75 | 6.94E-04 | 2.78E-02 | 1.82E-03 |
| Methionine Metabolism                       | 43 | 4 | 9.61  | 1.75 | 1.15E-03 | 4.48E-02 | 2.90E-03 |
| Ketone Body Metabolism                      | 13 | 3 | 9.12  | 1.75 | 1.59E-03 | 6.06E-02 | 3.86E-03 |
| Ammonia Recycling                           | 32 | 7 | 6.11  | 1.75 | 2.95E-03 | 1.09E-01 | 6.88E-03 |
| Folate Metabolism                           | 29 | 2 | 10.88 | 1.75 | 4.18E-03 | 1.51E-01 | 9.41E-03 |
| Arachidonic Acid Metabolism                 | 69 | 1 | 11.53 | 1.75 | 9.12E-03 | 3.19E-01 | 1.98E-02 |
| Malate-Aspartate Shuttle                    | 10 | 2 | 8.57  | 1.75 | 1.17E-02 | 3.96E-01 | 2.45E-02 |
| Lysine Degradation                          | 30 | 2 | 7.78  | 1.75 | 1.23E-02 | 4.06E-01 | 2.50E-02 |
| Butyrate Metabolism                         | 19 | 2 | 7.24  | 1.75 | 1.38E-02 | 4.42E-01 | 2.72E-02 |
| Glutathione Metabolism                      | 21 | 3 | 6.77  | 1.75 | 1.60E-02 | 4.97E-01 | 2.99E-02 |
| Propanoate Metabolism                       | 42 | 3 | 6.19  | 1.75 | 1.61E-02 | 4.97E-01 | 2.99E-02 |
| Pterine Biosynthesis                        | 29 | 1 | 9.01  | 1.75 | 2.20E-02 | 6.39E-01 | 3.51E-02 |
| Steroid Biosynthesis                        | 48 | 1 | 9.01  | 1.75 | 2.20E-02 | 6.39E-01 | 3.51E-02 |
| Androgen and Estrogen Metabolism            | 33 | 1 | 9.01  | 1.75 | 2.20E-02 | 6.39E-01 | 3.51E-02 |
| Androstenedione Metabolism                  | 24 | 1 | 9.01  | 1.75 | 2.20E-02 | 6.39E-01 | 3.51E-02 |
| Catecholamine Biosynthesis                  | 20 | 1 | 8.98  | 1.75 | 2.23E-02 | 6.39E-01 | 3.51E-02 |
| Thyroid hormone synthesis                   | 13 | 1 | 8.98  | 1.75 | 2.23E-02 | 6.39E-01 | 3.51E-02 |
| Nicotinate and Nicotinamide Metabolism      | 37 | 2 | 5.37  | 1.75 | 4.89E-02 | 1.00E+00 | 7.51E-02 |
| Aspartate Metabolism                        | 35 | 5 | 3.34  | 1.75 | 1.01E-01 | 1.00E+00 | 1.52E-01 |
| Arginine and Proline Metabolism             | 53 | 7 | 2.98  | 1.75 | 1.30E-01 | 1.00E+00 | 1.90E-01 |
| Threonine and 2-Oxobutanoate Degradation    | 20 | 1 | 3.56  | 1.75 | 1.56E-01 | 1.00E+00 | 2.12E-01 |
| Sphingolipid Metabolism                     | 40 | 1 | 3.47  | 1.75 | 1.62E-01 | 1.00E+00 | 2.12E-01 |
| Galactose Metabolism                        | 38 | 1 | 3.47  | 1.75 | 1.62E-01 | 1.00E+00 | 2.12E-01 |

|                                         |    |   |      |      |          |          |          |
|-----------------------------------------|----|---|------|------|----------|----------|----------|
| Lactose Synthesis                       | 20 | 1 | 3.47 | 1.75 | 1.62E-01 | 1.00E+00 | 2.12E-01 |
| Lactose Degradation                     | 9  | 1 | 3.47 | 1.75 | 1.62E-01 | 1.00E+00 | 2.12E-01 |
| Histidine Metabolism                    | 43 | 3 | 3.02 | 1.75 | 1.71E-01 | 1.00E+00 | 2.20E-01 |
| Purine Metabolism                       | 74 | 4 | 2.79 | 1.75 | 1.83E-01 | 1.00E+00 | 2.29E-01 |
| Beta-Alanine Metabolism                 | 34 | 3 | 2.85 | 1.75 | 1.85E-01 | 1.00E+00 | 2.29E-01 |
| Oxidation of Branched Chain Fatty Acids | 26 | 1 | 1.91 | 1.75 | 3.00E-01 | 1.00E+00 | 3.50E-01 |
| Mitochondrial Electron Transport Chain  | 19 | 1 | 1.91 | 1.75 | 3.00E-01 | 1.00E+00 | 3.50E-01 |
| Phytanic Acid Peroxisomal Oxidation     | 26 | 1 | 1.91 | 1.75 | 3.00E-01 | 1.00E+00 | 3.50E-01 |
| Biotin Metabolism                       | 8  | 1 | 1.10 | 1.75 | 4.33E-01 | 1.00E+00 | 4.82E-01 |
| Pyrimidine Metabolism                   | 59 | 1 | 1.09 | 1.75 | 4.36E-01 | 1.00E+00 | 4.82E-01 |
| Phenylacetate Metabolism                | 9  | 1 | 1.09 | 1.75 | 4.36E-01 | 1.00E+00 | 4.82E-01 |
| Spermidine and Spermine Biosynthesis    | 18 | 2 | 1.08 | 1.75 | 5.45E-01 | 1.00E+00 | 5.85E-01 |
| Porphyrin Metabolism                    | 40 | 1 | 0.62 | 1.75 | 5.57E-01 | 1.00E+00 | 5.85E-01 |
| Bile Acid Biosynthesis                  | 65 | 1 | 0.62 | 1.75 | 5.57E-01 | 1.00E+00 | 5.85E-01 |
| Ethanol Degradation                     | 19 | 1 | 0.57 | 1.75 | 5.75E-01 | 1.00E+00 | 5.94E-01 |
| Carnitine Synthesis                     | 22 | 3 | 1.01 | 1.75 | 5.93E-01 | 1.00E+00 | 6.03E-01 |
| Methylhistidine Metabolism              | 4  | 1 | 0.02 | 1.75 | 9.08E-01 | 1.00E+00 | 9.08E-01 |

**Table S5:** Pathway analysis by Reactome and relative p-value and number of hits.

| Pathway name                                                              | Entities |       |          |          |
|---------------------------------------------------------------------------|----------|-------|----------|----------|
|                                                                           | found    | ratio | P-value  | FDR*     |
| Amino acid transport across the plasma membrane                           | 17 / 34  | 0.017 | 1.11e-16 | 4.44e-15 |
| tRNA Aminoacylation                                                       | 16 / 28  | 0.014 | 1.11e-16 | 4.44e-15 |
| Mitochondrial tRNA aminoacylation                                         | 16 / 28  | 0.014 | 1.11e-16 | 4.44e-15 |
| Cytosolic tRNA aminoacylation                                             | 16 / 28  | 0.014 | 1.11e-16 | 4.44e-15 |
| Transport of inorganic cations/anions and amino acids/oligopeptides       | 21 / 63  | 0.032 | 1.11e-16 | 4.44e-15 |
| Na <sup>+</sup> /Cl <sup>-</sup> dependent neurotransmitter transporters  | 15 / 31  | 0.016 | 1.11e-16 | 4.44e-15 |
| Transport of bile salts and organic acids, metal ions and amine compounds | 21 / 86  | 0.043 | 1.11e-16 | 4.44e-15 |
| SLC-mediated transmembrane transport                                      | 25 / 180 | 0.091 | 4.44e-16 | 1.55e-14 |
| SLC transporter disorders                                                 | 18 / 90  | 0.045 | 7.89e-14 | 2.45e-12 |
| Translation                                                               | 16 / 65  | 0.033 | 1.26e-13 | 3.53e-12 |
| Disorders of transmembrane transporters                                   | 18 / 108 | 0.054 | 1.69e-12 | 4.24e-11 |
| Defective SLC6A19 causes Hartnup disorder (HND)                           | 9 / 13   | 0.007 | 8.03e-12 | 1.69e-10 |
| Defective SLC6A19 causes Hartnup disorder (HND)                           | 9 / 13   | 0.007 | 8.03e-12 | 1.69e-10 |
| Transport of small molecules                                              | 25 / 280 | 0.141 | 1.13e-11 | 2.26e-10 |
| Metabolism of amino acids and derivatives                                 | 26 / 318 | 0.16  | 2.32e-11 | 4.18e-10 |
| Variant SLC6A14 may confer susceptibility towards obesity                 | 9 / 15   | 0.008 | 2.82e-11 | 4.80e-10 |
| Tryptophan catabolism                                                     | 11 / 35  | 0.018 | 1.30e-10 | 2.09e-09 |
| Phenylalanine and tyrosine metabolism                                     | 8 / 33   | 0.017 | 4.11e-07 | 6.17e-06 |
| Ketone body metabolism                                                    | 6 / 19   | 0.01  | 2.98e-06 | 4.17e-05 |
| Metabolism of proteins                                                    | 18 / 277 | 0.139 | 4.73e-06 | 6.62e-05 |

**Table S6:** Clinical features of the patients during the follow-up.

| Parameter                                    | Baseline T0    |                 | 4 Weeks T1     |                 | <i>P value</i> <sup>b</sup> |
|----------------------------------------------|----------------|-----------------|----------------|-----------------|-----------------------------|
|                                              | Mean           | SD <sup>a</sup> | Mean           | SD <sup>a</sup> |                             |
| Weight, kg                                   | 85.13          | 19.81           | 76.51          | 17.58           | 0.062                       |
| Height, cm                                   | 165.81         | 9.65            |                |                 |                             |
| BMI, kg/m <sup>2</sup>                       | 30.82          | 5.96            | 27.79          | 5.23            | 0.839                       |
| <b>Diastolic blood pressure, mm Hg</b>       | <b>88.27</b>   | <b>24.62</b>    | <b>77.40</b>   | <b>24.23</b>    | <b>0.009</b>                |
| <b>Systolic blood pressure, mm Hg</b>        | <b>109.40</b>  | <b>25.22</b>    | <b>98.50</b>   | <b>20.22</b>    | <b>0.026</b>                |
| Waist, cm                                    | 100.13         | 17.60           | 90.73          | 20.40           | 0.072                       |
| <b>Hip, cm</b>                               | <b>111.03</b>  | <b>12.56</b>    | <b>104.15</b>  | <b>11.62</b>    | <b>0.032</b>                |
| Hemoglobin, g/dl                             | 14.51          | 1.14            | 14.30          | 0.84            | 0.407                       |
| <b>Lymphocytes, mmc</b>                      | <b>2.02</b>    | <b>0.73</b>     | <b>1.63</b>    | <b>0.53</b>     | <b>0.029</b>                |
| Hematocrit, %                                | 42.77          | 3.19            | 42.38          | 2.51            | 0.668                       |
| Glycated hemoglobin, %                       | 5.59           | 0.68            | 5.32           | 0.54            | 0.054                       |
| <b>Glycemia, mg/dL</b>                       | <b>90.60</b>   | <b>17.36</b>    | <b>77.23</b>   | <b>12.80</b>    | <b>0.001</b>                |
| Azotemia, mg/dL                              | 32.50          | 7.75            | 29.77          | 10.33           | 0.115                       |
| Creatinine, mg/dL                            | 0.76           | 0.21            | 0.73           | 0.21            | 0.321                       |
| Uricemia, mg/dL                              | 5.02           | 1.71            | 4.30           | 1.41            | 0.080                       |
| <b>Total cholesterol, mg/dL</b>              | <b>193.40</b>  | <b>31.34</b>    | <b>144.20</b>  | <b>27.13</b>    | <b>0.0001</b>               |
| <b>Low-density lipoprotein (LDL), mg/dL</b>  | <b>122.53</b>  | <b>24.94</b>    | <b>83.37</b>   | <b>25.48</b>    | <b>0.0001</b>               |
| High-density lipoprotein (HDL), mg/dL        | 52.07          | 18.23           | 44.20          | 14.22           | 0.079                       |
| Triglycerides, mg/dL                         | 130.30         | 81.89           | 96.93          | 40.38           | 0.124                       |
| <b>Apolipoprotein A1 (Apo A1), mg/dL</b>     | <b>140.73</b>  | <b>31.28</b>    | <b>114.10</b>  | <b>24.46</b>    | <b>0.001</b>                |
| <b>Apolipoprotein B (Apo B), mg/dL</b>       | <b>98.57</b>   | <b>19.18</b>    | <b>81.83</b>   | <b>16.66</b>    | <b>0.002</b>                |
| <b>Prothrombin time (PT), %</b>              | <b>1.08</b>    | <b>0.60</b>     | <b>1.05</b>    | <b>0.08</b>     | <b>0.002</b>                |
| <b>Partial thromboplastin time (PTT), s</b>  | <b>1.05</b>    | <b>0.36</b>     | <b>1.06</b>    | <b>0.12</b>     | <b>0.010</b>                |
| <b>International normalized ratio (INR)</b>  | <b>1.09</b>    | <b>0.54</b>     | <b>1.06</b>    | <b>0.13</b>     | <b>0.006</b>                |
| Alkaline phosphatase (ALP), U/l              | 68.87          | 24.65           | 59.70          | 19.93           | 0.058                       |
| <b>Aspartate transaminase (AST), U/l</b>     | <b>20.93</b>   | <b>7.21</b>     | <b>24.30</b>   | <b>6.86</b>     | <b>0.035</b>                |
| Alanine transaminase (ALT), U/l              | 25.33          | 15.48           | 25.97          | 14.21           | 0.610                       |
| <b>Gamma glutamyl transferase (γGT), U/l</b> | <b>28.57</b>   | <b>35.83</b>    | <b>14.03</b>   | <b>9.93</b>     | <b>0.002</b>                |
| Creatine kinase (CK), U/l                    | 120.53         | 62.37           | 140.90         | 96.98           | 0.429                       |
| Lactate dehydrogenase (LDH), U/l             | 400.60         | 127.60          | 366.83         | 94.79           | 0.308                       |
| <b>Direct bilirubin, mg/dl</b>               | <b>0.18</b>    | <b>0.08</b>     | <b>0.23</b>    | <b>0.10</b>     | <b>0.019</b>                |
| Total bilirubin, mg/dl                       | 0.53           | 0.31            | 0.53           | 0.33            | 0.881                       |
| <b>Choline esterase, (CHE), UI/l</b>         | <b>8535.63</b> | <b>2096.80</b>  | <b>7560.50</b> | <b>2265.25</b>  | <b>0.036</b>                |
| <b>Sideremia, μg/dL</b>                      | <b>93.13</b>   | <b>36.85</b>    | <b>72.97</b>   | <b>15.15</b>    | <b>0.017</b>                |
| Total protein, g/L                           | 6.99           | 0.45            | 6.97           | 0.39            | 0.795                       |
| Albumin, g/dL                                | 4.40           | 0.27            | 4.46           | 0.27            | 0.348                       |



|                                                                       |               |               |               |               |               |
|-----------------------------------------------------------------------|---------------|---------------|---------------|---------------|---------------|
| Sodium, mEq/L                                                         | 139.97        | 2.65          | 139.03        | 2.85          | 0.228         |
| Potassium, mEq/L                                                      | 4.55          | 0.38          | 4.63          | 0.37          | 0.462         |
| <b>Calcium, mg/dL</b>                                                 | <b>9.41</b>   | <b>0.40</b>   | <b>9.74</b>   | <b>0.53</b>   | <b>0.005</b>  |
| Magnesium, mEq/L                                                      | 2.11          | 0.15          | 2.05          | 0.17          | 0.121         |
| <b>Phosphorus, mg/dL</b>                                              | <b>3.23</b>   | <b>0.55</b>   | <b>4.58</b>   | <b>5.58</b>   | <b>0.003</b>  |
| <b>Fibrinogen, mg/dL</b>                                              | <b>315.77</b> | <b>47.82</b>  | <b>333.27</b> | <b>63.16</b>  | <b>0.223</b>  |
| Eritro-sedimentation velocity (VES),<br>mm/h                          | 16.57         | 9.28          | 16.13         | 10.56         | 0.796         |
| C-reactive protein (CRP), mg/L                                        | 3.07          | 1.20          | 2.55          | 1.35          | 0.143         |
| Free triiodothyronine (FT3), pg/ml                                    | 3.88          | 0.45          | 3.65          | 0.60          | 0.117         |
| Free thyroxine (FT4), ng/dl                                           | 1.12          | 0.17          | 1.16          | 0.17          | 0.211         |
| Thyrotropin (TSH), mIU/L                                              | 1.58          | 0.96          | 10.06         | 5.70          | 0.501         |
| <b>Folic acid, ng/mL</b>                                              | <b>5.52</b>   | <b>2.26</b>   | <b>10.66</b>  | <b>6.22</b>   | <b>0.0001</b> |
| <b>Vitamin B12, ng/L</b>                                              | <b>294.17</b> | <b>155.15</b> | <b>460.17</b> | <b>218.56</b> | <b>0.001</b>  |
| <b>Insulin, mcUI/ml</b>                                               | <b>11.53</b>  | <b>8.45</b>   | <b>6.07</b>   | <b>4.19</b>   | <b>0.006</b>  |
| <b>Omeostasis model assessment of insulin<br/>resistance, HOMA-IR</b> | <b>2.72</b>   | <b>1.73</b>   | <b>1.22</b>   | <b>1.00</b>   | <b>0.003</b>  |
| <b>Cortisol, µg/dl</b>                                                | <b>9.64</b>   | <b>3.44</b>   | <b>11.57</b>  | <b>2.88</b>   | <b>0.014</b>  |
| <i>Growth Hormone (GH), ng/ml</i>                                     | <i>0.77</i>   | <i>1.70</i>   | <i>2.25</i>   | <i>2.60</i>   | <i>0.0001</i> |
| <i>Homocysteine, µmol/L</i>                                           | <i>17.09</i>  | <i>8.59</i>   | <i>14.58</i>  | <i>3.93</i>   | <i>0.003</i>  |
| Aortomesenteric fat thickness (AMFT),<br>mm                           | 16.99         | 8.34          | 13.61         | 7.35          | 0.050         |
| <b>PASI</b>                                                           | <b>8.69</b>   | <b>7.13</b>   | <b>4.10</b>   | <b>3.65</b>   | <b>0.007</b>  |
| <b>DLQI</b>                                                           | <b>12.83</b>  | <b>8.69</b>   | <b>3.70</b>   | <b>4.31</b>   | <b>0.0001</b> |
| BSA, %                                                                | 16.02         | 11.62         | 8.68          | 4.01          | 0.073         |
| <b>VAS pruritus</b>                                                   | <b>43.67</b>  | <b>36.36</b>  | <b>14.41</b>  | <b>11.01</b>  | <b>0.003</b>  |
| <b>VAS pain</b>                                                       | <b>37.83</b>  | <b>33.85</b>  | <b>11.07</b>  | <b>8.18</b>   | <b>0.003</b>  |
